# Supplementary material
Source: publisher figshare collection journal article supplement (https://acs.figshare.com/ndownloader/files/4515283)
Supplement: Supplementary file 1 [file 4515283]

## Supporting Material for the paper:

“Conformational Study of a Bent-core Liquid Crystal:  $^{13}\text{C}$  NMR  
and DFT Computation Approach”

by

Ronald Y. Dong and Alberto Marini

**Table S.1:** Relative energies (in kcal/mol) and populations in (%) for **ABC<sub>i</sub>**, **BCD<sub>i</sub>** and **CDE<sub>i</sub>** conformers.

| Conformation           | $\psi_2$ (°) | $\psi_4$ (°) | $\Delta E$ (Kcal/mol) | $P$ (%) |
|------------------------|--------------|--------------|-----------------------|---------|
| <b>ABC<sub>1</sub></b> | 30           | 60           | 0.102                 | 13.0    |
| <b>ABC<sub>2</sub></b> | -30          | 60           | 0.000                 | 16.0    |
| <b>ABC<sub>3</sub></b> | 150          | 60           | 0.212                 | 11.0    |
| <b>ABC<sub>4</sub></b> | -150         | 60           | 0.263                 | 10.0    |
| <b>ABC<sub>5</sub></b> | 30           | -60          | 0.000                 | 16.0    |
| <b>ABC<sub>6</sub></b> | -30          | -60          | 0.102                 | 13.0    |
| <b>ABC<sub>7</sub></b> | 150          | -60          | 0.263                 | 10.0    |
| <b>ABC<sub>8</sub></b> | -150         | -60          | 0.212                 | 11.0    |
| Conformation           | $\psi_4$ (°) | $\psi_5$ (°) | $\Delta E$ (Kcal/mol) | $P$ (%) |
| <b>BCD<sub>1</sub></b> | 45           | -165         | 0.000                 | 30.0    |
| <b>BCD<sub>2</sub></b> | 45           | -15          | 1.665                 | 1.9     |
| <b>BCD<sub>3</sub></b> | 45           | 15           | 2.315                 | 0.6     |
| <b>BCD<sub>4</sub></b> | 45           | 165          | 0.325                 | 17.5    |
| <b>BCD<sub>5</sub></b> | -45          | -165         | 0.325                 | 17.5    |
| <b>BCD<sub>6</sub></b> | -45          | -15          | 2.315                 | 0.6     |
| <b>BCD<sub>7</sub></b> | -45          | 15           | 1.665                 | 1.9     |
| <b>BCD<sub>8</sub></b> | -45          | 165          | 0.000                 | 30.0    |
| Conformation           | $\psi_5$ (°) | $\psi_7$ (°) | $\Delta E$ (Kcal/mol) | $P$ (%) |
| <b>CDE<sub>1</sub></b> | 30           | 0            | 0.685                 | 6.0     |
| <b>CDE<sub>2</sub></b> | -30          | 0            | 0.685                 | 6.0     |
| <b>CDE<sub>3</sub></b> | 150          | 0            | 0                     | 19.0    |
| <b>CDE<sub>4</sub></b> | -150         | 0            | 0                     | 19.0    |
| <b>CDE<sub>5</sub></b> | 30           | 180          | 0.685                 | 6.0     |
| <b>CDE<sub>6</sub></b> | -30          | 180          | 0.685                 | 6.0     |
| <b>CDE<sub>7</sub></b> | 150          | 180          | 0                     | 19.0    |
| <b>CDE<sub>8</sub></b> | -150         | 180          | 0                     | 19.0    |

**Figure S.1:** Plot of the relevant fragmental angles (with respect to the *para* axis of ring D) and Cartesian z-axis systems for the two distinct conformational states of A131 in its  $N_u$  (a) and  $N_b$  (b) phases. For the sake of clarity, only the carbon skeletal has been reported for each conformation, together with the proper formulae for the estimations of the bent angle of A131. UL and LL refer to Upper and Lower Limit (based on fragmental angles that are average values in the respective phases) of the bend angle, respectively.

a) **Nematic Uniaxial**

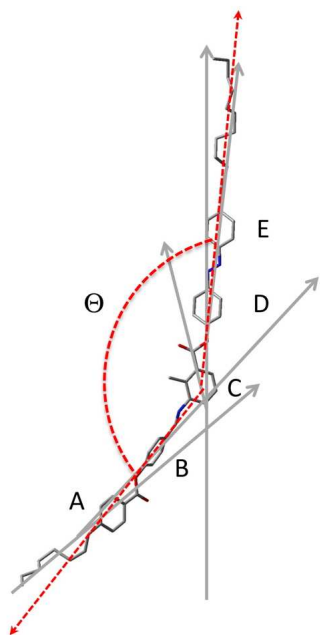

$$LL(N_u): \Theta = 180^\circ - \theta_B + \theta_E - \theta_A = 180^\circ - 35^\circ + 18^\circ - 10^\circ = 153^\circ$$

$$UL(N_u): \Theta = 180^\circ - \theta_B + \theta_E = 180^\circ - 35^\circ + 18^\circ = 163^\circ$$

b) **Nematic Biaxial**

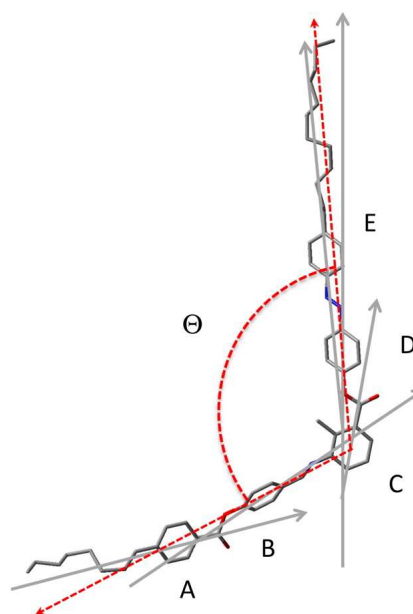

$$LL(N_b): \Theta = 180^\circ - \theta_B - \theta_E - \theta_A = 180^\circ - 32^\circ - 19^\circ - 18^\circ = 111^\circ$$

$$UL(N_b): \Theta = 180^\circ - \theta_B - \theta_E = 180^\circ - 32^\circ - 19^\circ = 129^\circ$$
